# Supplementary material for: Prolonged fixation and post-mortem delay impede the study of adult neurogenesis in mice
Source: PubMed Central journal article supplement (PMC10517969; doi:10.1038/s42003-023-05367-z), 2023-09-23
Supplement: 42003_2023_5367_MOESM1_ESM.pdf [file 42003_2023_5367_MOESM1_ESM.pdf]

**Supplementary Material for**  
**“Prolonged fixation and post-mortem delay impede the study of adult neurogenesis in mice”**

M. Gallardo-Caballero<sup>a,b,c</sup>; C.B. Rodríguez-Moreno<sup>a,b</sup>; L. Álvarez-Méndez<sup>a,c</sup>; J. Terreros-Roncal<sup>a,b</sup>; M. Flor-García<sup>a,b,c</sup>; E.P. Moreno-Jiménez<sup>a,b,c</sup>; A. Rábano<sup>d</sup>; M. Llorens-Martín<sup>a,b,c\*</sup>.

<sup>a</sup> Department of Molecular Neuropathology, Centro de Biología Molecular “Severo Ochoa” (CBMSO), Spanish Research Council (CSIC)–Universidad Autónoma de Madrid (UAM); Madrid (Spain).

<sup>b</sup> Center for Networked Biomedical Research on Neurodegenerative Diseases (CIBERNED); Madrid (Spain).

<sup>c</sup> Department of Molecular Biology, Faculty of Sciences, Universidad Autónoma de Madrid; Madrid (Spain).

<sup>d</sup> CIEN Foundation; Madrid (Spain).

\*Correspondence should be addressed to: **María Llorens-Martín** ([m.llorens@csic.es](mailto:m.llorens@csic.es), Centro de Biología Molecular “Severo Ochoa”, Spanish Research Council (CSIC). Universidad Autónoma de Madrid (campus de Cantoblanco), c/Nicolás Cabrera 1, 28049, Madrid (Spain). Phone number: +34-911964632.

**Running title:** Prolonged fixation and post-mortem delay impede the study of adult neurogenesis

**Keywords:** Adult hippocampal neurogenesis; post-mortem delay, fixation, doublecortin

**Supplementary Figure 1: Impact of the post-mortem delay (PMD) and fixation time on the detection of markers of immature dentate granule cells (DGCs).**

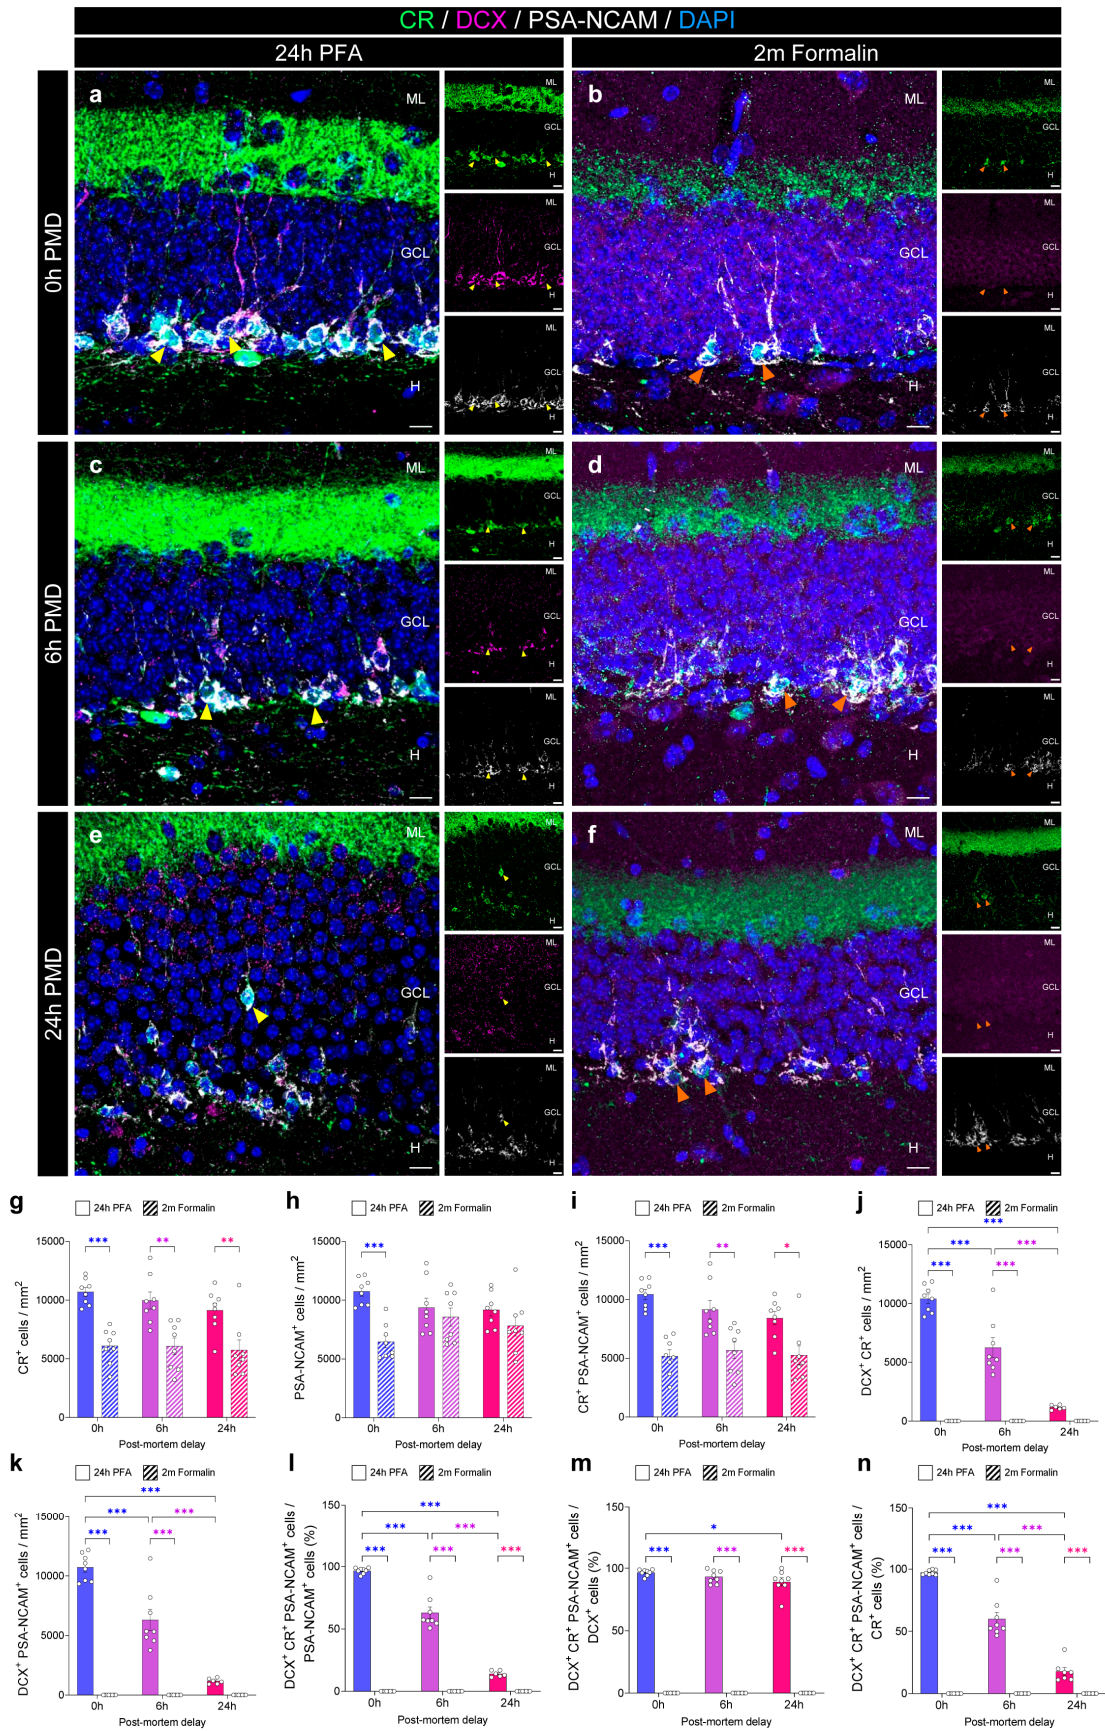

**a – f:** Representative images of Doublecortin (DCX)<sup>+</sup>, Calretinin (CR)<sup>+</sup>, and Polysialylated-neural cell adhesion molecule (PSA-NCAM)<sup>+</sup> staining under distinct experimental conditions. The DCX and DAPI images displayed are the same as those included in **Figure 1 b – g**. In this supplementary figure, the CR and PSA-NCAM channels have been added and merged images are shown. **g:** Density of CR<sup>+</sup> immature DGCs. **h:** Density of PSA-NCAM<sup>+</sup> immature DGCs. **i:** Density of CR<sup>+</sup> PSA-NCAM<sup>+</sup> immature DGCs. **j:** Density of DCX<sup>+</sup> CR<sup>+</sup> immature DGCs. **k:** Density of DCX<sup>+</sup> PSA-NCAM<sup>+</sup> immature DGCs. **l:** Percentage of DCX<sup>+</sup> CR<sup>+</sup> PSA-NCAM<sup>+</sup> out of total PSA-NCAM<sup>+</sup> cells. **m:** Percentage of DCX<sup>+</sup> CR<sup>+</sup> PSA-NCAM<sup>+</sup> out of total DCX<sup>+</sup> cells. **n:** Percentage of DCX<sup>+</sup> CR<sup>+</sup> PSA-NCAM<sup>+</sup> out of total CR<sup>+</sup> cells. ML: Molecular layer. GCL: Granule cell layer. H: Hilus. White scale bar: 10 μm. Yellow triangles: DCX<sup>+</sup> CR<sup>+</sup> PSA-NCAM<sup>+</sup> immature DGCs. Orange triangles: CR<sup>+</sup> PSA-NCAM<sup>+</sup> immature DGCs. Graphs represent mean values ± SEM. n = 8 mice. \* 0.05 > p ≥ 0.01; \*\* 0.01 > p ≥ 0.001; and \*\*\* p < 0.001.

**Supplementary Figure 2: Performance of distinct anti-Doublecortin (DCX) antibodies under distinct experimental conditions.**

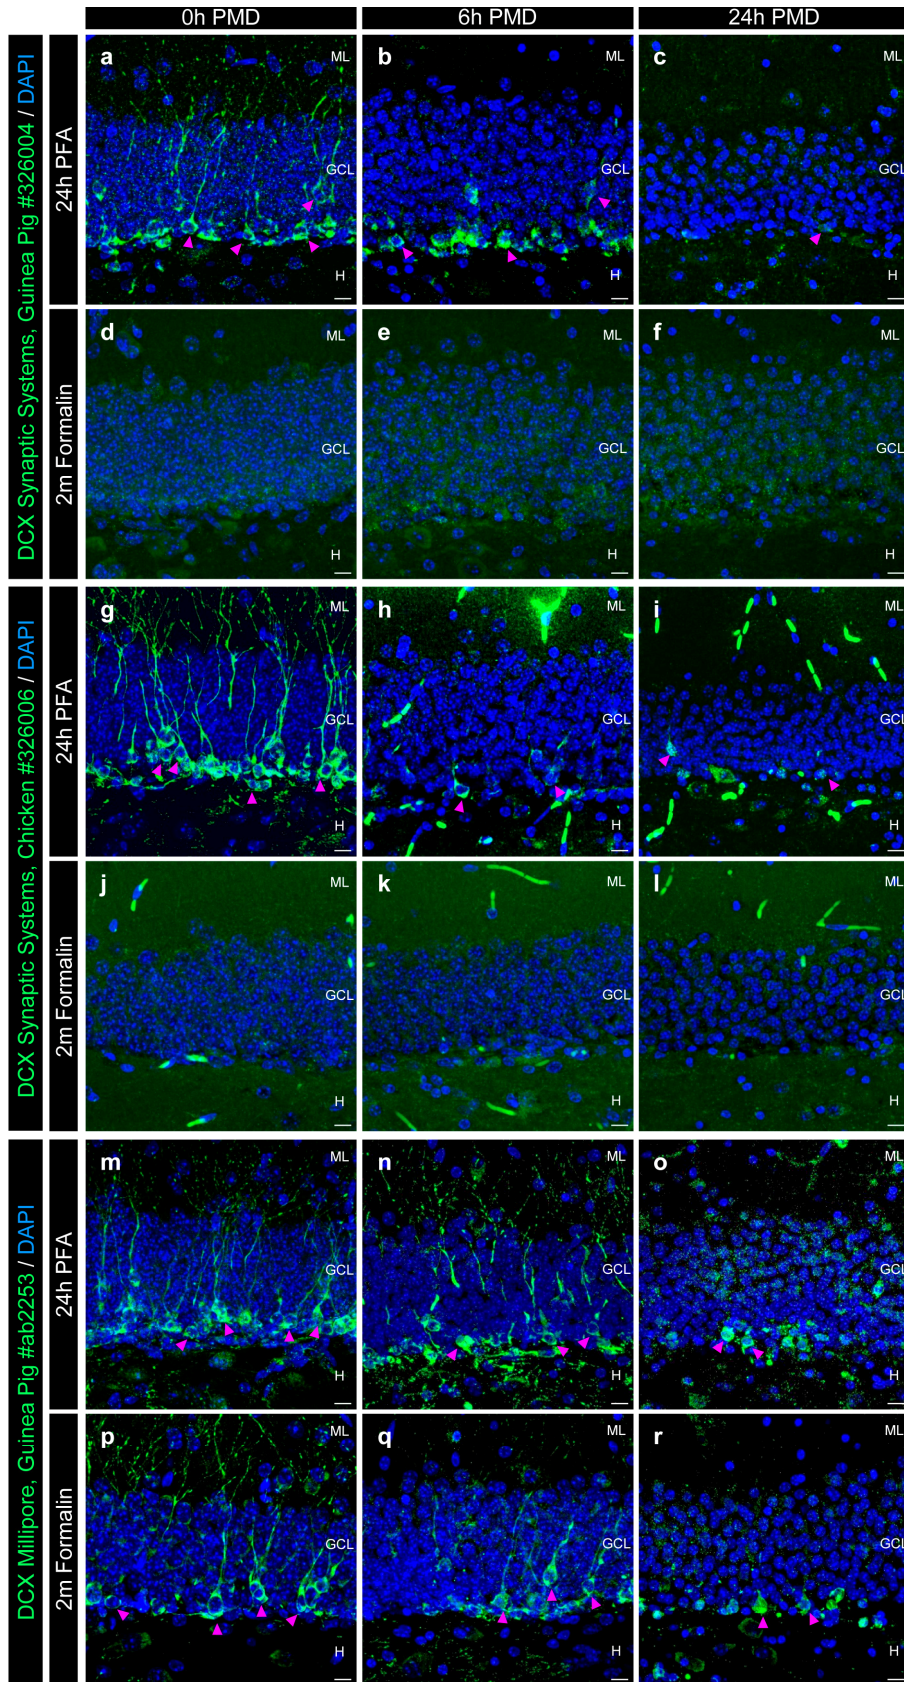

**a – r:** Representative images of DCX staining using a guinea pig (**a – f:** Synaptic Systems #326004), a chicken (**g – l:** Synaptic systems #326006), and another guinea pig (**m – r:** Millipore #ab2253) anti-DCX antibody. Z-projection images are shown. ML: Molecular layer. GCL: Granule cell layer. H: Hilus. White scale bar: 10  $\mu$ m. Magenta triangles: DCX<sup>+</sup> immature DGCs.

**Supplementary Figure 3: Performance of distinct anti-Doublecortin (DCX) antibodies under distinct experimental conditions.**

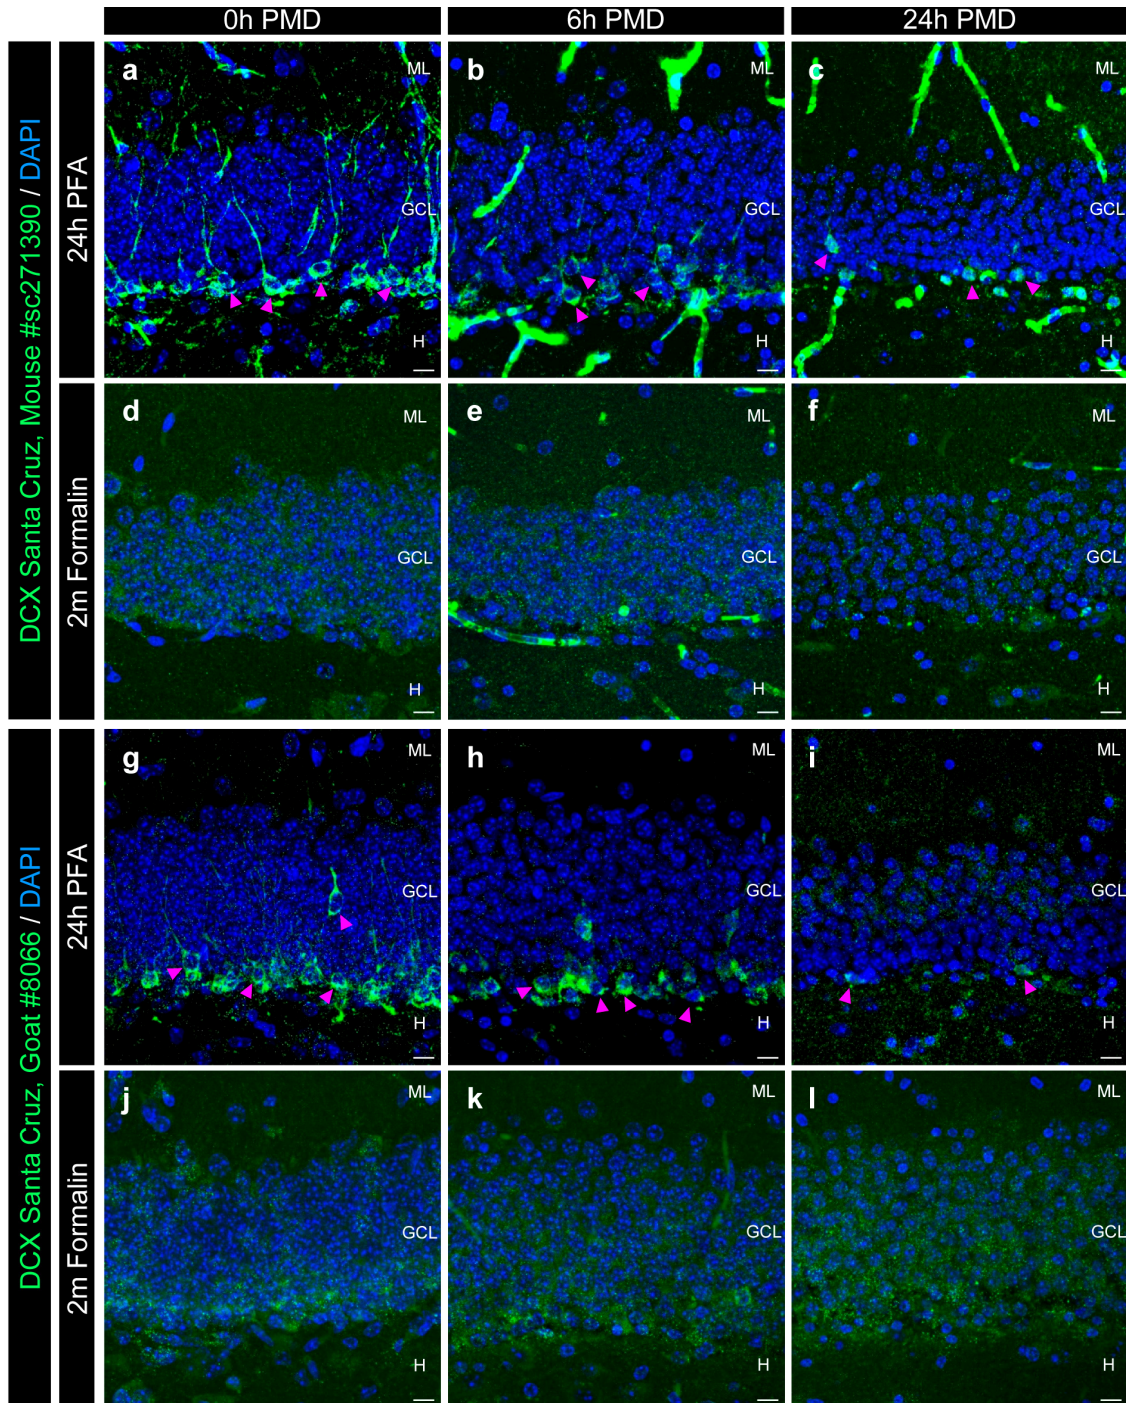

**a – r:** Representative images of DCX staining using a mouse (**a – f:** Santa Cruz #sc271390) and a goat (**g – i:** Santa Cruz #8066) anti-DCX antibodies. Z-projection images are shown. ML: Molecular layer. GCL: Granule cell layer. H: Hilus. White scale bar: 10  $\mu$ m. Magenta triangles: DCX<sup>+</sup> immature DGCs.

**Supplementary Figure 4: Performance of distinct rabbit anti-Doublecortin (DCX) antibodies under distinct experimental conditions.**

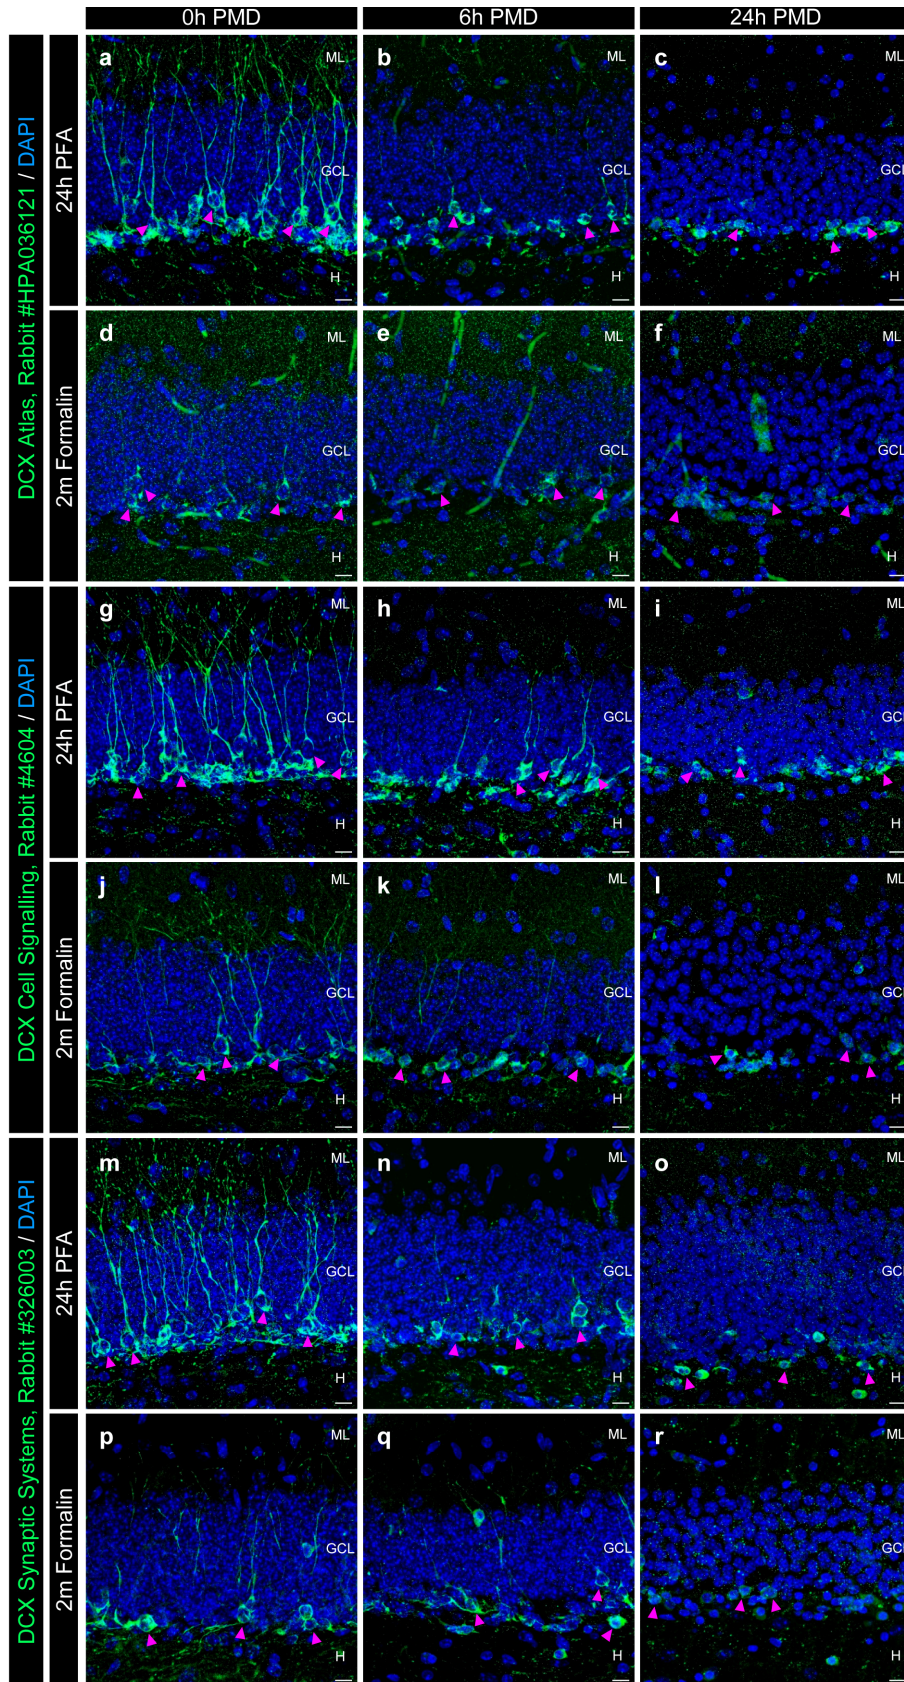

**a – r:** Representative images of DCX staining using three rabbit anti-DCX antibodies (**a – f:** Atlas Antibodies #HPA036121; **g – i:** Cell Signalling #4604; **m – r:** Synaptic systems #326003). Z-projection images are shown. ML: Molecular layer. GCL: Granule cell layer. H: Hilus. White scale bar: 10  $\mu$ m. Magenta triangles: DCX<sup>+</sup> immature DGCs.



**Supplementary Figure 5: Performance of distinct rabbit anti-Doublecortin (DCX) antibodies under distinct experimental conditions.**

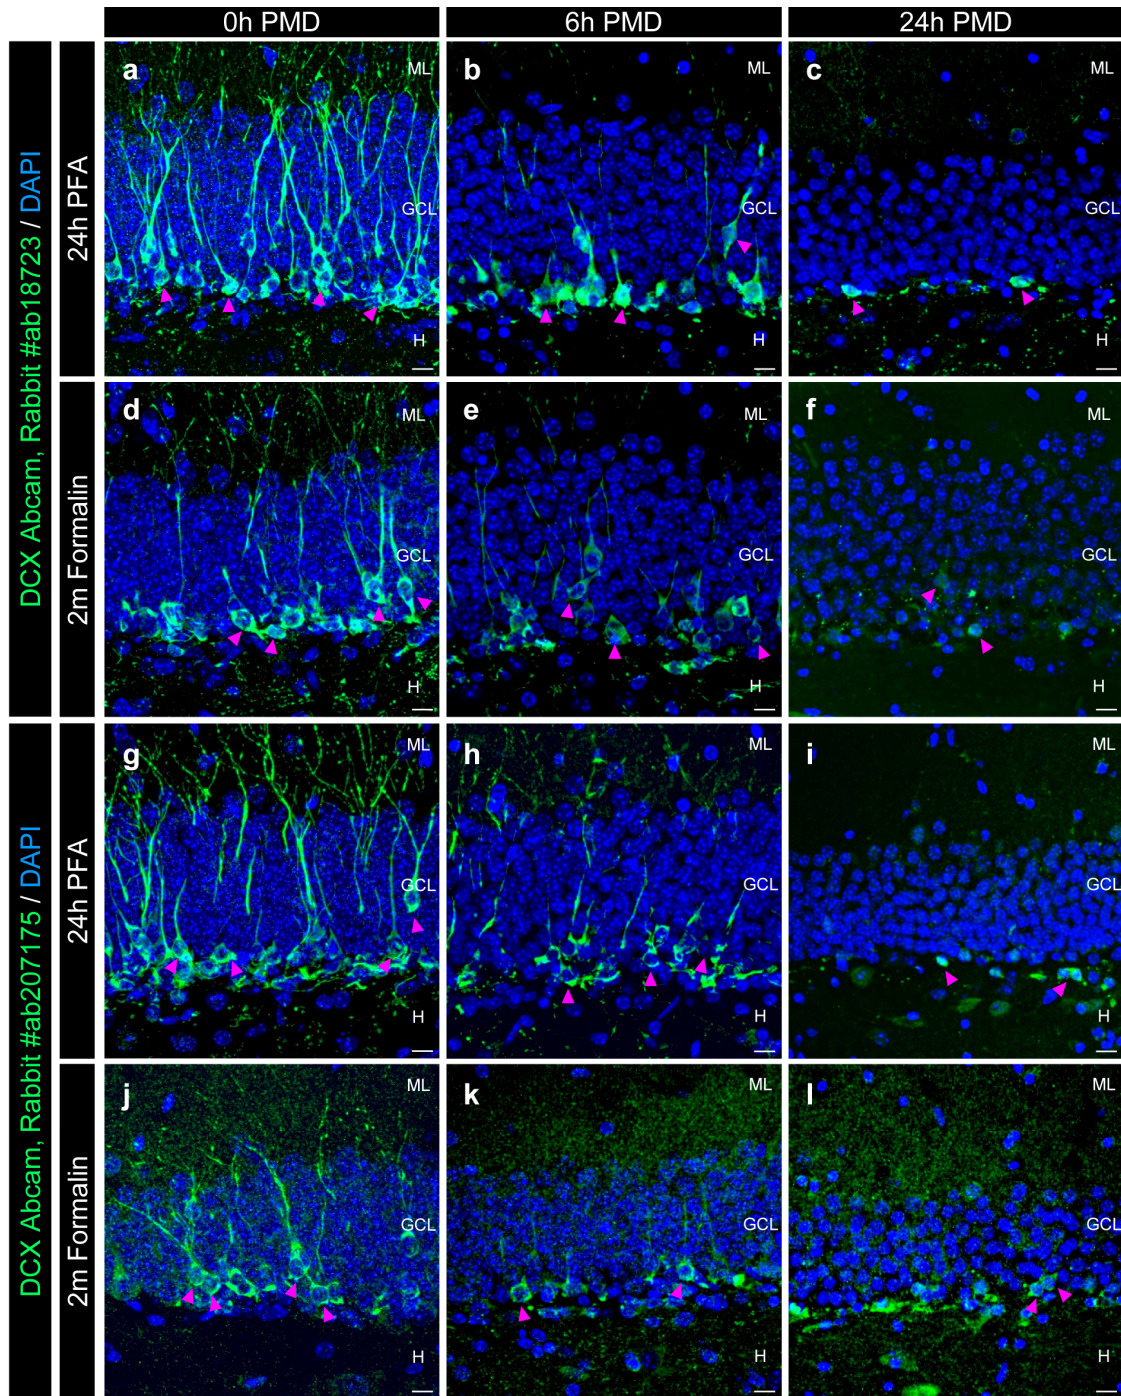

**a – l:** Representative images of DCX staining using two rabbit anti-DCX antibodies (**a – f:** Abcam #ab18723; **g – l:** Abcam #ab207175). Z-projection images are shown. ML: Molecular layer. GCL: Granule cell layer. H: Hilus. White scale bar: 10  $\mu$ m. Magenta triangles: DCX<sup>+</sup> immature DG cells.

**Supplementary Figure 6: Impact of the post-mortem delay (PMD) and fixation time on the detection of Ki67<sup>+</sup> proliferative cells.**

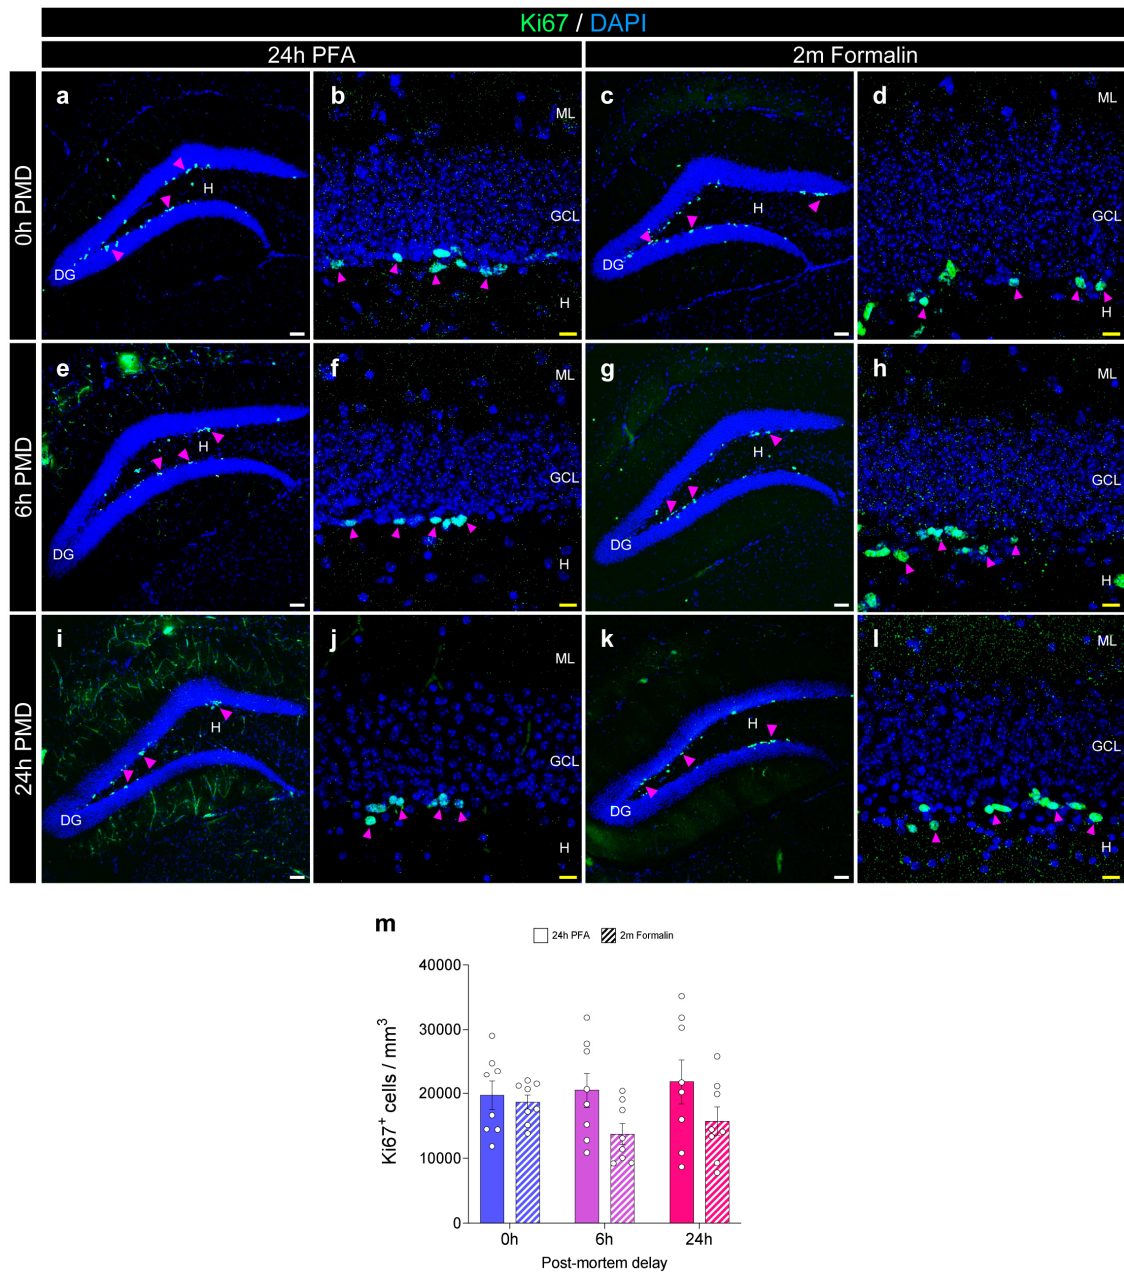

**a – l:** Representative images of Ki67 staining under distinct experimental conditions. **m:** Density of Ki67<sup>+</sup> proliferative cells. In **a – l**, Z-projection images are shown. DG: Dentate Gyrus. ML: Molecular layer. GCL: Granule cell layer. H: Hilus. White scale bar: 50  $\mu$ m. Yellow scale bar: 10  $\mu$ m. Magenta triangles: Ki67<sup>+</sup> cells. Graphs represent mean values  $\pm$  SEM. n = 8 mice.

**Supplementary Figure 7: Performance of distinct anti-Doublecortin (DCX) antibodies after 0.5% NaBH<sub>4</sub> and heat-mediated citrate buffer antigen retrieval (HC-AR) pre-treatments on samples subjected to 0 h post-mortem delay and prolonged fixation.**

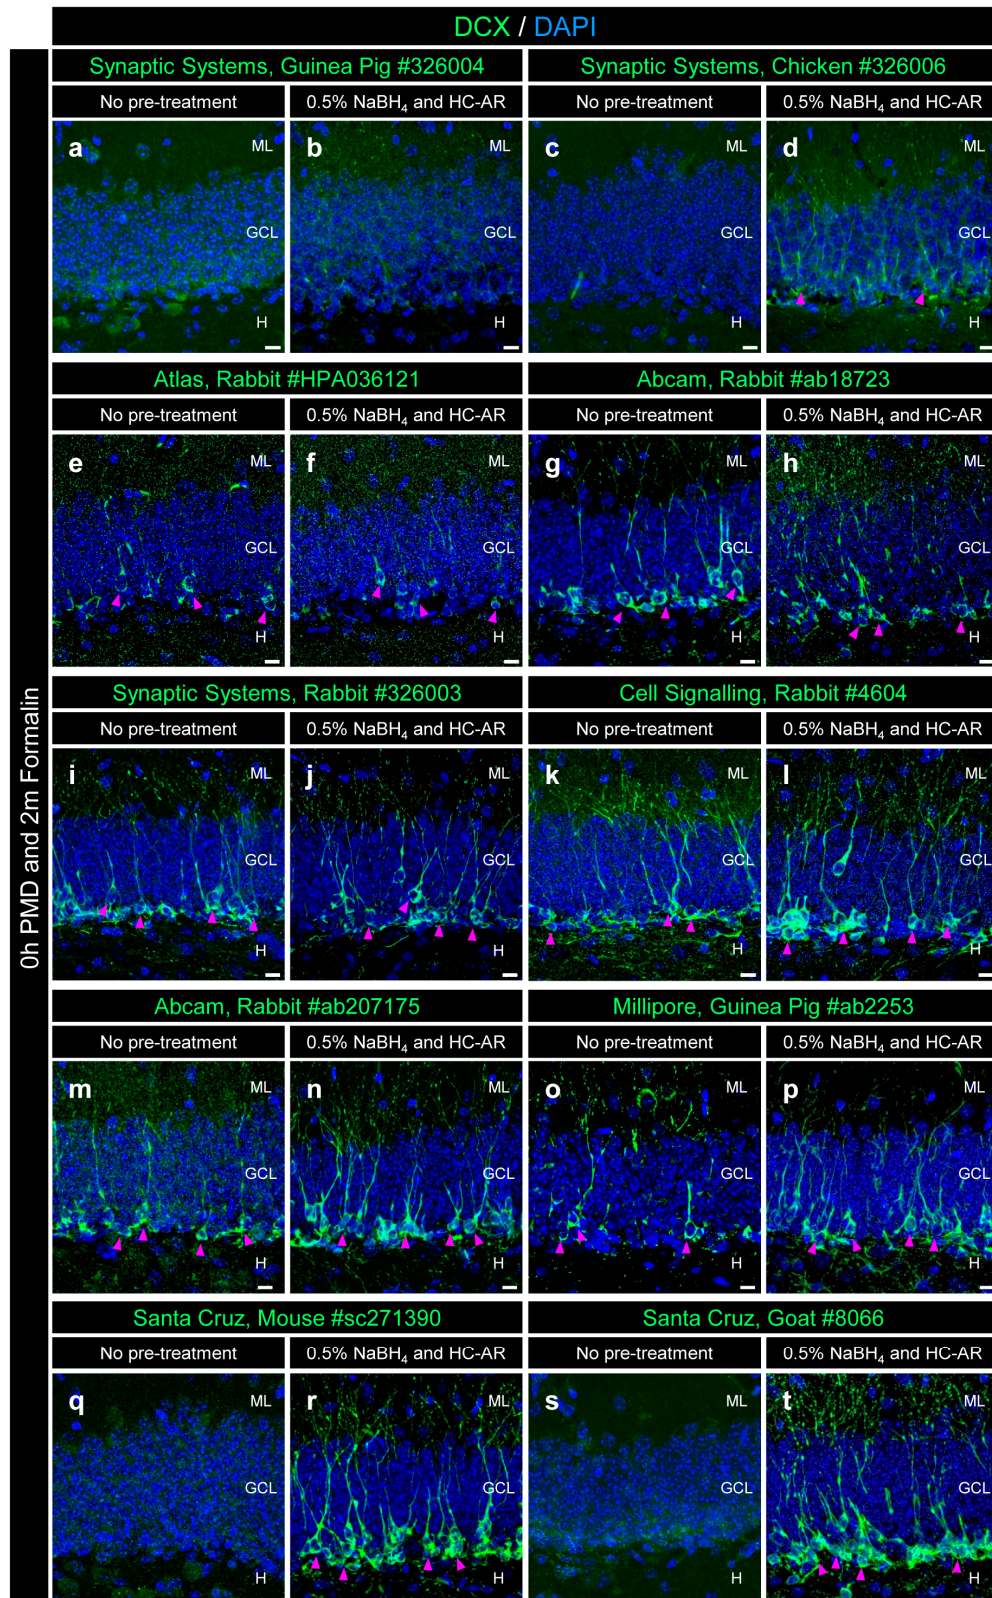

**a – t:** Representative images of DCX staining using distinct antibodies (**a – b:** Synaptic Systems, Guinea Pig #326004; **c – d:** Synaptic Systems, Chicken #326006; **e – f:** Atlas, Rabbit #HPA036121; **g – h:** Abcam, Rabbit #ab18723; **i – j:** Synaptic Systems, Rabbit #326003; **k – l:** Cell Signalling, Rabbit #4604; **m – n:** Abcam, Rabbit #ab207175; **o – p:** Millipore, Guinea Pig #ab2253; **q – r:** Santa Cruz, Mouse #sc271390; **s – t:** Santa Cruz, Goat #8066). Z-projection images are shown. ML: Molecular layer. GCL: Granule cell layer. H: Hilus. White scale bar: 10  $\mu$ m. Magenta triangles: DCX+ immature DGCs.

**Supplementary Figure 8: Impact of the method of euthanasia on the detection of Doublecortin (DCX)<sup>+</sup> cells.**

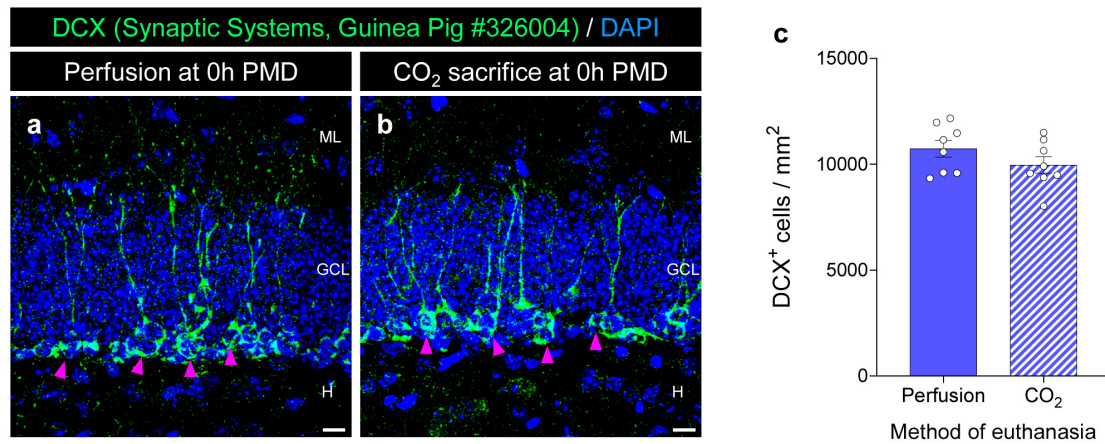

**a – b:** Representative images of anti-DCX (Synaptic Systems, Guinea Pig #326004#) staining under distinct experimental conditions. **c:** Density of DCX<sup>+</sup> immature dentate granule cells detected. In **a – b**, Z-projection images are shown. ML: Molecular layer. GCL: Granule cell layer. H: Hilus. White scale bar: 10  $\mu$ m. Magenta triangles: DCX<sup>+</sup> immature DGCs. Graphs represent mean values  $\pm$  SEM. n = 8 mice.

**Supplementary Figure 9: Raw Western blot image.**

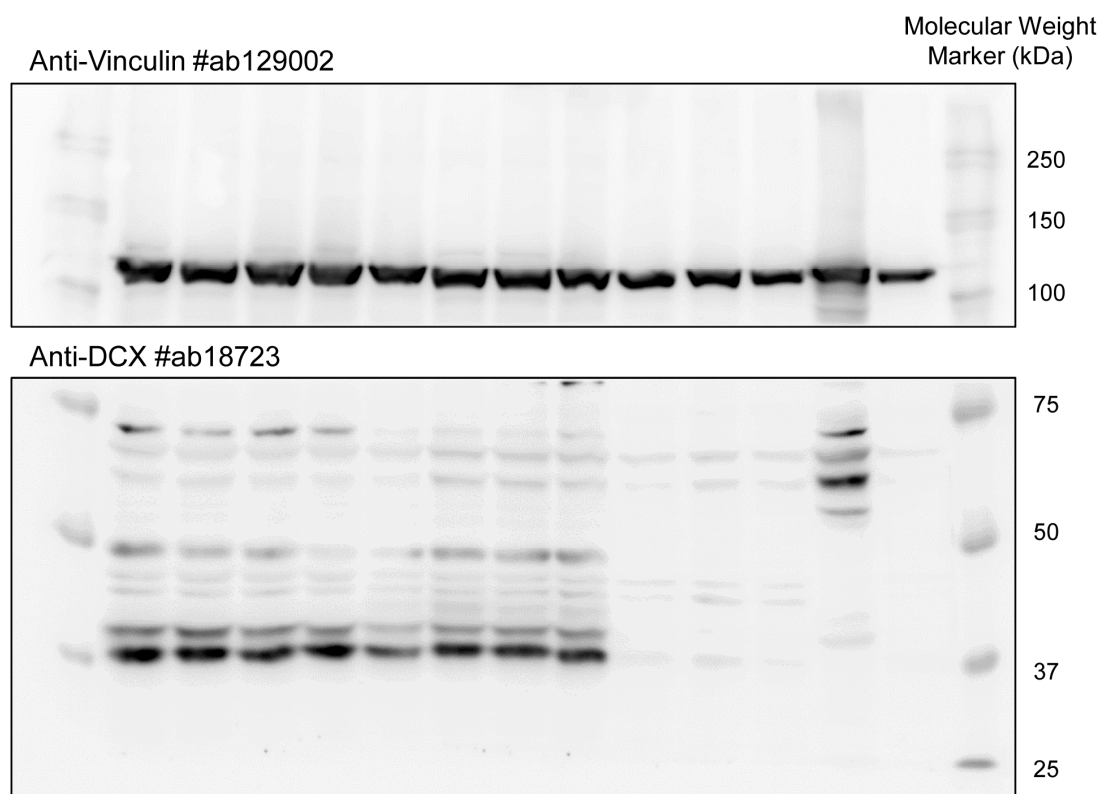

**Supplementary Table 1. List of primary antibodies used.**

| Antibody                                                | Species    | Company          | Catalog Number            | RRID        | Working concentration | Use           |
|---------------------------------------------------------|------------|------------------|---------------------------|-------------|-----------------------|---------------|
| Calbindin (CB)                                          | Mouse      | Sigma            | #C9848                    | AB_476894   | 1/400                 | IHC           |
| Calretinin (CR)                                         | Rabbit     | Swant            | #CR-7697                  | AB_2619710  | 1/500                 | IHC           |
| Doublecortin (DCX)                                      | Chicken    | Synaptic Systems | #326006                   | AB_2737040  | 1/500                 | IHC           |
| Doublecortin (DCX)                                      | Goat       | Santa Cruz       | #8066<br>(discontinued)   | AB_2088494  | 1/1,000               | IHC           |
| Doublecortin (DCX)                                      | Guinea Pig | Millipore        | #ab2253                   | AB_1586992  | 1/250                 | IHC           |
| Doublecortin (DCX)                                      | Guinea Pig | Synaptic Systems | #326004                   | AB_2620068  | 1/500                 | IHC           |
| Doublecortin (DCX)                                      | Mouse      | Santa Cruz       | #sc271390                 | AB_10610966 | 1/50                  | IHC           |
| Doublecortin (DCX)                                      | Rabbit     | Abcam            | #ab18723                  | AB_732011   | 1/500                 | IHC and<br>WB |
| Doublecortin (DCX)                                      | Rabbit     | Atlas            | #HPA036121                | AB_2674950  | 1/100                 | IHC           |
| Doublecortin (DCX)                                      | Rabbit     | Cell Signalling  | #4604                     | AB_561007   | 1/250                 | IHC           |
| Doublecortin (DCX)                                      | Rabbit     | Synaptic Systems | #326003                   | AB_2620067  | 1/500                 | IHC           |
| Doublecortin (DCX)                                      | Rabbit     | Abcam            | #ab207175                 | AB_2894710  | 1/1,000               | IHC           |
| Iba1                                                    | Chicken    | Synaptic Systems | #234006<br>(discontinued) | AB_2619949  | 1/1,000               | IHC           |
| Ki67                                                    | Rabbit     | Abcam            | #ab15580                  | AB_443209   | 1/500                 | IHC           |
| Polysialylated neural cell adhesion molecule (PSA-NCAM) | Mouse      | Millipore        | #mab5324                  | AB_95211    | 1/1,000               | IHC           |
| S100 calcium-binding protein $\beta$ (S100 $\beta$ )    | Guinea Pig | Synaptic Systems | #287004                   | AB_2620025  | 1/500                 | IHC           |
| SRY (sex determining region Y)-box 2 (Sox2)             | Goat       | R and D Systems  | #AF2018                   | AB_355110   | 1/700                 | IHC           |
| Vimentin                                                | Rabbit     | Abcam            | #ab193555                 | AB_2814713  | 1/1,000               | IHC           |
| Vinculin                                                | Rabbit     | Abcam            | #ab129002                 | AB_11144129 | 1/7,500               | WB            |

The antigen, host species, company, catalog number, RRID, concentration, and use are shown.

**Supplementary Table 2. List of secondary antibodies used.**

| Antibody                  | Species | Company                | Catalog Number | RRID       | Working concentration | Use |
|---------------------------|---------|------------------------|----------------|------------|-----------------------|-----|
| Alexa-488 Anti-Rabbit     | Donkey  | Thermo Fisher          | #A-21206       | AB_2535792 | 1/1,000               | IHC |
| Alexa-555 Anti-Mouse      | Donkey  | Thermo Fisher          | #A-31570       | AB_2536180 | 1/1,000               | IHC |
| Alexa-555 Anti-Guinea Pig | Goat    | Thermo Fisher          | #A-21435       | AB_2535856 | 1/1,000               | IHC |
| Alexa-555 Anti-Goat       | Donkey  | Thermo Fisher          | #A-21432       | AB_2535853 | 1/1,000               | IHC |
| Alexa-647 Anti-Mouse      | Donkey  | Thermo Fisher          | #A-31571       | AB_162542  | 1/1,000               | IHC |
| Alexa-647 Anti-Guinea Pig | Donkey  | Jackson ImmunoResearch | #706-605-148   | AB_2340476 | 1/1,000               | IHC |
| Alexa-647 Anti-Chicken    | Goat    | Thermo Fisher          | #A-21449       | AB_2535866 | 1/1,000               | IHC |
| HRP Anti-Rabbit           | Goat    | Dako                   | #P0448         | AB_2617138 | 1/1,000               | WB  |

The antigen, host species, company, catalog number, RRID, concentration, and use are shown.
