# Supplementary material for: Prolonged fixation and post-mortem delay impede the study of adult neurogenesis in mice
Source: PubMed Central journal article supplement (PMC10517969; doi:10.1038/s42003-023-05367-z), 2023-09-23
Supplement: 42003_2023_5367_MOESM2_ESM.pdf [file 42003_2023_5367_MOESM2_ESM.pdf]

## **Description of Additional Supplementary Files**

**File name:** Supplementary Data 1

**Description:** Detailed results from statistical comparisons. The results of all statistical comparisons included in this manuscript are presented. Each tab includes all the statistical comparisons that refer to a single Figure or Supplementary Figure.

**File name:** Supplementary Data 2

**Description:** Numerical source data. Source data underlying the graphs and charts presented in the Main and Supplementary Figures.
