# Supplementary material for: Prolonged fixation and post-mortem delay impede the study of adult neurogenesis in mice
Source: PubMed Central journal article supplement (PMC10517969; doi:10.1038/s42003-023-05367-z), 2023-09-23
Supplement: 42003_2023_5367_MOESM4_ESM.pdf [file 42003_2023_5367_MOESM4_ESM.pdf]

## Reporting Summary

Nature Portfolio wishes to improve the reproducibility of the work that we publish. This form provides structure for consistency and transparency in reporting. For further information on Nature Portfolio policies, see our [Editorial Policies](#) and the [Editorial Policy Checklist](#).

### Statistics

For all statistical analyses, confirm that the following items are present in the figure legend, table legend, main text, or Methods section.

n/a Confirmed

- The exact sample size ( $n$ ) for each experimental group/condition, given as a discrete number and unit of measurement
- A statement on whether measurements were taken from distinct samples or whether the same sample was measured repeatedly
- The statistical test(s) used AND whether they are one- or two-sided  
*Only common tests should be described solely by name; describe more complex techniques in the Methods section.*
- A description of all covariates tested
- A description of any assumptions or corrections, such as tests of normality and adjustment for multiple comparisons
- A full description of the statistical parameters including central tendency (e.g. means) or other basic estimates (e.g. regression coefficient) AND variation (e.g. standard deviation) or associated estimates of uncertainty (e.g. confidence intervals)
- For null hypothesis testing, the test statistic (e.g.  $F$ ,  $t$ ,  $r$ ) with confidence intervals, effect sizes, degrees of freedom and  $P$  value noted  
*Give  $P$  values as exact values whenever suitable.*
- For Bayesian analysis, information on the choice of priors and Markov chain Monte Carlo settings
- For hierarchical and complex designs, identification of the appropriate level for tests and full reporting of outcomes
- Estimates of effect sizes (e.g. Cohen's  $d$ , Pearson's  $r$ ), indicating how they were calculated

*Our web collection on [statistics for biologists](#) contains articles on many of the points above.*

### Software and code

Policy information about [availability of computer code](#)

Data collection

Data analysis

For manuscripts utilizing custom algorithms or software that are central to the research but not yet described in published literature, software must be made available to editors and reviewers. We strongly encourage code deposition in a community repository (e.g. GitHub). See the Nature Portfolio [guidelines for submitting code & software](#) for further information.

### Data

Policy information about [availability of data](#)

All manuscripts must include a [data availability statement](#). This statement should provide the following information, where applicable:

- Accession codes, unique identifiers, or web links for publicly available datasets
- A description of any restrictions on data availability
- For clinical datasets or third party data, please ensure that the statement adheres to our [policy](#)

## Research involving human participants, their data, or biological material

Policy information about studies with [human participants or human data](#). See also policy information about [sex, gender \(identity/presentation\), and sexual orientation](#) and [race, ethnicity and racism](#).

|                                                                    |                                                                          |
|--------------------------------------------------------------------|--------------------------------------------------------------------------|
| Reporting on sex and gender                                        | <input type="text" value="No human subjects participate in this study"/> |
| Reporting on race, ethnicity, or other socially relevant groupings | <input type="text" value="N/A"/>                                         |
| Population characteristics                                         | <input type="text" value="N/A"/>                                         |
| Recruitment                                                        | <input type="text" value="N/A"/>                                         |
| Ethics oversight                                                   | <input type="text" value="N/A"/>                                         |

Note that full information on the approval of the study protocol must also be provided in the manuscript.

## Field-specific reporting

Please select the one below that is the best fit for your research. If you are not sure, read the appropriate sections before making your selection.

Life sciences       Behavioural & social sciences       Ecological, evolutionary & environmental sciences

For a reference copy of the document with all sections, see [nature.com/documents/nr-reporting-summary-flat.pdf](https://nature.com/documents/nr-reporting-summary-flat.pdf)

## Life sciences study design

All studies must disclose on these points even when the disclosure is negative.

|                 |                                                                                                                                                                                                                    |
|-----------------|--------------------------------------------------------------------------------------------------------------------------------------------------------------------------------------------------------------------|
| Sample size     | <input type="text" value="Sample size was determined according to our knowledge from previous studies."/>                                                                                                          |
| Data exclusions | <input type="text" value="Atypical data were identified using using GraphPad Prism 9 software (GraphPad.v.9.4.1 (681), 2022; GraphPad Software, LLC) and extreme outlier values were eliminated when necessary."/> |
| Replication     | <input type="text" value="The number of biological replicates is detailed in the Material and Methods subsections"/>                                                                                               |
| Randomization   | <input type="text" value="Mice were randomly allocated to the distinct experimental groups"/>                                                                                                                      |
| Blinding        | <input type="text" value="No specific blinding strategy was used"/>                                                                                                                                                |

## Reporting for specific materials, systems and methods

We require information from authors about some types of materials, experimental systems and methods used in many studies. Here, indicate whether each material, system or method listed is relevant to your study. If you are not sure if a list item applies to your research, read the appropriate section before selecting a response.

### Materials & experimental systems

| n/a                      | Involvement in the study                                        |
|--------------------------|-----------------------------------------------------------------|
| <input type="checkbox"/> | <input checked="" type="checkbox"/> Antibodies                  |
| <input type="checkbox"/> | <input type="checkbox"/> Eukaryotic cell lines                  |
| <input type="checkbox"/> | <input type="checkbox"/> Palaeontology and archaeology          |
| <input type="checkbox"/> | <input checked="" type="checkbox"/> Animals and other organisms |
| <input type="checkbox"/> | <input type="checkbox"/> Clinical data                          |
| <input type="checkbox"/> | <input type="checkbox"/> Dual use research of concern           |
| <input type="checkbox"/> | <input type="checkbox"/> Plants                                 |

### Methods

| n/a                      | Involvement in the study                        |
|--------------------------|-------------------------------------------------|
| <input type="checkbox"/> | <input type="checkbox"/> ChIP-seq               |
| <input type="checkbox"/> | <input type="checkbox"/> Flow cytometry         |
| <input type="checkbox"/> | <input type="checkbox"/> MRI-based neuroimaging |

## Antibodies

|                 |                                                                                                                                                                                                                                |
|-----------------|--------------------------------------------------------------------------------------------------------------------------------------------------------------------------------------------------------------------------------|
| Antibodies used | <input type="text" value="The following primary antibodies have been used in immunofluorescence: Mouse anti-Calbindin, Sigma #C9848, RRID: AB_476894, 1/400 Rabbit anti-Calretinin, Swant #CR-7697, RRID: AB_2619710, 1/500"/> |
|-----------------|--------------------------------------------------------------------------------------------------------------------------------------------------------------------------------------------------------------------------------|

Chicken anti-Doublecortin, Synaptic Systems #326006, RRID: AB\_2737040, 1/500  
 Goat anti-Doublecortin, Santa Cruz #8066 (discontinued), RRID: AB\_2088494, 1/1,000  
 Guinea Pig anti-Doublecortin, Millipore #ab2253, RRID: AB\_1586992, 1/250  
 Guinea Pig anti-Doublecortin, Synaptic Systems #326004, RRID: AB\_2620068, 1/500  
 Mouse anti-Doublecortin, Santa Cruz #sc271390, RRID: AB\_10610966, 1/50  
 Rabbit anti-Doublecortin, Abcam #ab18723, RRID: AB\_732011, 1/500  
 Rabbit anti-Doublecortin, Atlas #HPA036121, RRID: AB\_2674950, 1/100  
 Rabbit anti-Doublecortin, Cell Signalling #4604, RRID: AB\_561007, 1/250  
 Rabbit anti-Doublecortin, Synaptic Systems #326003, RRID: AB\_2620067, 1/500  
 Rabbit anti-Doublecortin, Abcam #ab207175, RRID: AB\_2894710, 1/1,000  
 Chicken anti-Iba1, Synaptic Systems #234006 (discontinued), RRID: AB\_2619949, 1/1,000  
 Rabbit anti-Ki67, Abcam #ab15580, RRID: AB\_443209, 1/500  
 Mouse anti- Polysialylated neural cell adhesion molecule, Millipore #mab5324, RRID: AB\_95211, 1/1,000  
 Guinea pig anti-S100 calcium-binding protein  $\beta$ , Synaptic Systems #287004, RRID: AB\_2620025, 1/500  
 Goat anti-SRY (sex determining region Y)-box 2 (Sox2), R and D Systems #AF2018, RRID: AB\_355110, 1/700  
 Rabbit anti-Vimentin, Abcam #ab193555, RRID: AB\_2814713, 1/1,000  
 Rabbit anti-Vinculin, Abcam #ab129002, RRID: AB\_11144129, 1/7,500

The following secondary antibodies were used to detect the binding of primary antibodies:  
 Donkey Alexa-488 Anti-Rabbit, Thermo Fisher #A-21206, RRID: AB\_2535792, 1/1,000  
 Donkey Alexa-555 Anti-Mouse, Thermo Fisher #A-31570, RRID: AB\_2536180, 1/1,000  
 Goat Alexa-555 Anti-Guinea Pig, Thermo Fisher #A-21435, RRID: AB\_2535856, 1/1,000  
 Donkey Alexa-555 Anti-Goat, Thermo Fisher #A-21432, RRID: AB\_2535853, 1/1,000  
 Donkey Alexa-647 Anti-Mouse, Thermo Fisher #A-31571, RRID: AB\_162542, 1/1,000  
 Donkey Alexa-647 Anti-Guinea Pig, Jackson ImmunoResearch #706-605-148, RRID: AB\_2340476, 1/1,000  
 Goat Alexa-647 Anti-Chicken, Thermo Fisher #A-21449, RRID: AB\_2535866, 1/1,000  
 Goat HRP Anti-Rabbit, Dako #P0448, RRID: AB\_2617138, 1/1,000

## Validation

- Mouse anti-Calbindin, Sigma #C9848, RRID: AB\_476894, 1/400: Validated by manufacturer to detect Calbindin of mouse, human, guinea pig, canine, sheep, rat, pig, rabbit, feline, bovine, goat origin by IHC, WB and ELISA.

- Rabbit anti-Calretinin, Swant #CR-7697, RRID: AB\_2619710, 1/500: validated by manufacturer to detect Calretinin of human, monkey, rat, mouse, guinea pig, chicken, and fish origin by WB and IHC.

- Chicken anti-Doublecortin, Synaptic Systems #326006, RRID: AB\_2737040, 1/500: validated by manufacturer to detect Doublecortin of mice origin by ICC and IHC.

- Goat anti-Doublecortin, Santa Cruz #8066 (discontinued), RRID: AB\_2088494, 1/1,000: Validated by manufacturer to detect Doublecortin of mouse, rat, human, and avian origin by WB, IP, IF, IHC, and ELISA.

- Guinea Pig anti-Doublecortin, Millipore #ab2253, RRID: AB\_1586992, 1/250: Validated by manufacturer to detect Doublecortin of mouse and rat origin by WB, IHC and ICC.

- Guinea Pig anti-Doublecortin, Synaptic Systems #326004, RRID: AB\_2620068, 1/500: validated by manufacturer to detect Doublecortin of mice and rat origin by WB, IP, ICC and IHC.

- Mouse anti-Doublecortin, Santa Cruz #sc271390, RRID: AB\_10610966, 1/50: Validated by manufacturer to detect Doublecortin of mouse, rat, and human origin by WB, IP, IF, IHC, and ELISA.

- Rabbit anti-Doublecortin, Abcam #ab18723, RRID: AB\_732011, 1/500: Validated by manufacturer to detect Doublecortin of mouse, rat, and quail origin by WB, IHC and ICC.

- Rabbit anti-Doublecortin, Atlas #HPA036121, RRID: AB\_2674950, 1/100: Validated by manufacturer to detect Doublecortin of human origin by IHC

- Rabbit anti-Doublecortin, Cell Signalling #4604, RRID: AB\_561007, 1/250: Validated by manufacturer to detect Doublecortin of mouse and rat origin by WB, IP, IF, IHC and ICC.

- Rabbit anti-Doublecortin, Synaptic Systems #326003, RRID: AB\_2620067, 1/500: validated by manufacturer to detect Doublecortin of mice, rat and human origin by WB, IP, ICC and IHC.

- Rabbit anti-Doublecortin, Abcam #ab207175, RRID: AB\_2894710, 1/1,000: validated by manufacturer to detect Doublecortin of mice, rat and human origin by WB, IF, ICC and IHC.

- Chicken anti-Iba1, Synaptic Systems #234006 (discontinued), RRID: AB\_2619949, 1/1,000: validated by manufacturer to detect Iba1 of mice, rat and human origin by WB, IF, ICC and IHC.

- Rabbit anti-Ki67, Abcam #ab15580, RRID: AB\_443209, 1/500: validated by manufacturer to detect Ki-67 of mice and human origin by ICC and IHC.

- Mouse anti- Polysialylated neural cell adhesion molecule (PSA-NCAM), Millipore #mab5324, RRID: AB\_95211, 1/1,000: validated by manufacturer to detect PSA-NCAM of mice, rat and human origin by ICC, IHC, RIA and WB.

- Guinea pig anti-S100 calcium-binding protein  $\beta$  (S100 $\beta$ ), Synaptic Systems #287004, RRID: AB\_2620025, 1/500: validated by

manufacturer to detect S100 $\beta$  of mice and rat origin by ICC and IHC.

- Goat anti-SRY (sex determining region Y)-box 2 (Sox2), R and D Systems #AF2018, RRID: AB\_355110, 1/700: validated by manufacturer to detect Sox2 of mice, rat and human origin by WB, ChIP and ICC.

- Rabbit anti-Vimentin, Abcam #ab193555, RRID: AB\_2814713, 1/1,000: validated by manufacturer to detect Vimentin of mice, rat, African green monkey and human origin by WB, Flow cytometry, IHC, IF and ICC.

- Rabbit anti-Vinculin, Abcam #ab129002, RRID:AB\_11144129, 1/7,500: validated by manufacturer to detect Vinculin of mice, rat and human origin by WB, Flow cytometry, IP, IF and ICC.

Secondary antibodies were validated by manufacturer and have been extensively validated in the literature.

## Eukaryotic cell lines

Policy information about [cell lines and Sex and Gender in Research](#)

|                                                                      |     |
|----------------------------------------------------------------------|-----|
| Cell line source(s)                                                  | N/A |
| Authentication                                                       | N/A |
| Mycoplasma contamination                                             | N/A |
| Commonly misidentified lines<br>(See <a href="#">ICLAC</a> register) | N/A |

## Palaeontology and Archaeology

|                                                                                                                                                 |     |
|-------------------------------------------------------------------------------------------------------------------------------------------------|-----|
| Specimen provenance                                                                                                                             | N/A |
| Specimen deposition                                                                                                                             | N/A |
| Dating methods                                                                                                                                  | N/A |
| <input type="checkbox"/> Tick this box to confirm that the raw and calibrated dates are available in the paper or in Supplementary Information. |     |
| Ethics oversight                                                                                                                                | N/A |

Note that full information on the approval of the study protocol must also be provided in the manuscript.

## Animals and other research organisms

Policy information about [studies involving animals; ARRIVE guidelines](#) recommended for reporting animal research, and [Sex and Gender in Research](#)

|                         |                                                                                                                    |
|-------------------------|--------------------------------------------------------------------------------------------------------------------|
| Laboratory animals      | Seven- to nine-week-old C57BL/6J-OlaHsd mice                                                                       |
| Wild animals            | N/A                                                                                                                |
| Reporting on sex        | All mice included in the study were female.                                                                        |
| Field-collected samples | N/A                                                                                                                |
| Ethics oversight        | Animal experiments were approved by the CBMSO (AEEC-CBMSO-23/172) and National (PROEX 185.4/20) Ethics Committees. |

Note that full information on the approval of the study protocol must also be provided in the manuscript.

## Clinical data

Policy information about [clinical studies](#)

All manuscripts should comply with the ICMJE [guidelines for publication of clinical research](#) and a completed [CONSORT checklist](#) must be included with all submissions.

|                             |     |
|-----------------------------|-----|
| Clinical trial registration | N/A |
| Study protocol              | N/A |
| Data collection             | N/A |

Outcomes

N/A

## Dual use research of concern

Policy information about [dual use research of concern](#)

### Hazards

Could the accidental, deliberate or reckless misuse of agents or technologies generated in the work, or the application of information presented in the manuscript, pose a threat to:

No | Yes

- Public health
- National security
- Crops and/or livestock
- Ecosystems
- Any other significant area

### Experiments of concern

Does the work involve any of these experiments of concern:

No | Yes

- Demonstrate how to render a vaccine ineffective
- Confer resistance to therapeutically useful antibiotics or antiviral agents
- Enhance the virulence of a pathogen or render a nonpathogen virulent
- Increase transmissibility of a pathogen
- Alter the host range of a pathogen
- Enable evasion of diagnostic/detection modalities
- Enable the weaponization of a biological agent or toxin
- Any other potentially harmful combination of experiments and agents

## Plants

Seed stocks

N/A

Novel plant genotypes

N/A

Authentication

N/A

## ChIP-seq

### Data deposition

- Confirm that both raw and final processed data have been deposited in a public database such as [GEO](#).
- Confirm that you have deposited or provided access to graph files (e.g. BED files) for the called peaks.

Data access links

*May remain private before publication.*

N/A

Files in database submission

N/A

Genome browser session

*(e.g. [UCSC](#))*

N/A

### Methodology

Replicates

N/A

Sequencing depth

N/A

|                         |     |
|-------------------------|-----|
| Antibodies              | N/A |
| Peak calling parameters | N/A |
| Data quality            | N/A |
| Software                | N/A |

## Flow Cytometry

### Plots

Confirm that:

- The axis labels state the marker and fluorochrome used (e.g. CD4-FITC).
- The axis scales are clearly visible. Include numbers along axes only for bottom left plot of group (a 'group' is an analysis of identical markers).
- All plots are contour plots with outliers or pseudocolor plots.
- A numerical value for number of cells or percentage (with statistics) is provided.

### Methodology

|                           |     |
|---------------------------|-----|
| Sample preparation        | N/A |
| Instrument                | N/A |
| Software                  | N/A |
| Cell population abundance | N/A |
| Gating strategy           | N/A |

- Tick this box to confirm that a figure exemplifying the gating strategy is provided in the Supplementary Information.

## Magnetic resonance imaging

### Experimental design

|                                 |     |
|---------------------------------|-----|
| Design type                     | N/A |
| Design specifications           | N/A |
| Behavioral performance measures | N/A |

### Acquisition

|                               |                                                                 |
|-------------------------------|-----------------------------------------------------------------|
| Imaging type(s)               | N/A                                                             |
| Field strength                | N/A                                                             |
| Sequence & imaging parameters | N/A                                                             |
| Area of acquisition           | N/A                                                             |
| Diffusion MRI                 | <input type="checkbox"/> Used <input type="checkbox"/> Not used |

### Preprocessing

|                            |     |
|----------------------------|-----|
| Preprocessing software     | N/A |
| Normalization              | N/A |
| Normalization template     | N/A |
| Noise and artifact removal | N/A |

Volume censoring

N/A

## Statistical modeling & inference

Model type and settings

N/A

Effect(s) tested

N/A

Specify type of analysis:  Whole brain  ROI-based  Both

Statistic type for inference

N/A

(See [Eklund et al. 2016](#))

Correction

N/A

## Models & analysis

n/a | Involved in the study

  Functional and/or effective connectivity  Graph analysis  Multivariate modeling or predictive analysis
